# Supplementary material
Source: PubMed Central journal article supplement (PMC4920772)
Supplement: 12088_2016_596_MOESM1_ESM.pdf [file 12088_2016_596_MOESM1_ESM.pdf]

## **Copyright Transfer and Financial Disclosure/Conflict of Interest Statement**

The copyright to this article is transferred to the Association of Microbiologists of India (for U.S. government employees: to the extent transferable) effective if and when the article is accepted for publication. The author warrants that his/her contribution is original and that he/she has full power to make this grant. The author signs for and accepts responsibility for releasing this material on behalf of any and all co-authors. The copyright transfer covers the exclusive right to reproduce and distribute the article, including reprints, translations, photographic reproductions, microform, electronic form (offline, online) or any other reproductions of similar nature.

An author may self-archive an author-created version of his/her article on his/her own website and or in his/her institutional repository. He/she may also deposit this version on his/her funder's or funder's designated repository at the funder's request or as a result of a legal obligation, provided it is not made publicly available until 12 months after official publication. He/she may not use the publisher's PDF version, which is posted on [www.springerlink.com](http://www.springerlink.com), for the purpose of self-archiving or deposit. Furthermore, the author may only post his/her version provided acknowledgement is given to the original source of publication and a link is inserted to the published article on Springer's website. The link must be accompanied by the following text: "The original publication is available at [www.springerlink.com](http://www.springerlink.com)".

The author is requested to use the appropriate DOI for the article. Articles disseminated via [www.springerlink.com](http://www.springerlink.com) are indexed, abstracted and referenced by many abstracting and information services, bibliographic networks, subscription agencies, library networks, and consortia. After submission of the agreement signed by the corresponding author, changes of authorship or in the order of the authors listed will not be accepted.

I, the undersigned corresponding author, also certify that I/we have no commercial associations (e.g., consultancies, stock ownership, equity interests, patent-licensing arrangements, etc.) that might pose a conflict of interest in connection with the submitted article, except as disclosed on a separate attachment. All funding sources supporting the work and all institutional or corporate affiliations of mine/ours are acknowledged in a footnote. *Please mention if a separate attachment is enclosed.*

### **Title of the article**

[Comparison of DOT-ELISA and Standard-ELISA for detection of the Vibrio cholera toxin in culture supernatants of bacteria isolated from human and environmental samples](#)

### **Author (s)**

[Antonio Meza-Lucas, María Fernanda Pérez-Villagómez, José-Patricio Martínez-López, Ricardo García-Rodea, María-Guadalupe Martínez-Castelán, Alejandro Escobar-Gutiérrez, Jorge-Luis de-la-Rosa-Arana, Altigracia Villanueva-Zamudio](#)

### **Author(s)' signature (s)**

[Jorge-Luis de-la-Rosa-Arana](#)



### **Date**

[May 11th; 2016](#)

Please sign this form, scan and upload to:  
[www.editorialmanager.com/injm](http://www.editorialmanager.com/injm) while submitting your manuscript.

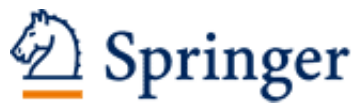

<http://www.springer.com/journal/12088>

Indian Journal of Microbiology

Editor-in-Chief: Kalia, V.C.

ISSN: 0046-8991 (print version)

ISSN: 0973-7715 (electronic version)

Journal no. 12088
